# Supplementary material for: Exploring measurement invariance by gender in the profile of mood states depression subscale among cancer survivors
Source: Springer Nature journal article supplement (doi:10.1007/s11136-016-1452-x), 2016-11-11
Supplement: MOESM3 [file 11041606]

Appendix 3

The large modification indices of MG-CFA model suggested to correlate residuals (error terms) of three items (Unhappy, Sad, and Blue) in order to improve the model fit (see Table of modification indices below). Based on the substantive decision which there is a theoretical rationale (e.g., content similarity: three items could be considered asking the same content), we let three items’ residuals to be covaried. The figure below illustrated the correlation of three items’ residuals.

Table A. Correlation among three items by gender group

|  | Men | | |  |  | Women | | |
| --- | --- | --- | --- | --- | --- | --- | --- | --- |
|  | Unhappy | Sad | Blue |  |  | Unhappy | Sad | Blue |
| Unhappy | − | − | − |  | Unhappy | − | − | − |
| Sad | .65** | − | − |  | Sad | .67** | − | − |
| Blue | .62** | .71** | − |  | Blue | .63** | .70** | − |

Note. ** Correlation is significant at the 0.01 level (2-tailed)

Table B. Model modification indices (M-plus output)

| Correlation | M.I. |
| --- | --- |
| “Unhappy” with “Sad” | 153.503 |
| “Unhappy” with “Blue” | 21.436 |
| “Sad” with “Blue" | 131.639 |

Note. M.I.=modification indices for direct effects of observed dependent variables regressed on covariates and residual covariance among observed dependent variables may not be included; Minimum M.I. value=3.840.
